# Supplementary material for: Whole Genome Analysis of Environmental Pseudomonas mendocina Strains: Virulence Mechanisms and Phylogeny
Source: MDPI journal article supplement (doi:10.3390/genes12010115), 2021-01-19
Supplement: s1 [file s1]

## SUPPLEMENTARY MATERIAL

# Whole genome analysis of environmental *Pseudomonas mendocina* strains: virulence mechanisms and phylogeny.

Lidia Ruiz-Roldán <sup>1,†</sup>, María de Toro <sup>2,\*</sup> and Yolanda Sáenz <sup>1,\*</sup>

<sup>1</sup> Área de Microbiología Molecular, Centro de Investigación Biomédica de La Rioja (CIBIR), C/ Piqueras 98, 26006, Logroño, Spain. [lidiarroldan@gmail.com](mailto:lidiarroldan@gmail.com) (L.R.R.); [ysaenz@riojasalud.es](mailto:ysaenz@riojasalud.es) (Y.S.).

<sup>2</sup> Plataforma de Genómica y Bioinformática, Centro de Investigación Biomédica de La Rioja (CIBIR), C/ Piqueras 98, 26006, Logroño, Spain. [mthernando@riojasalud.es](mailto:mthernando@riojasalud.es).

† Current address: Joint Research Unit "Infection and Public Health" FISABIO-University of Valencia, Institute for Integrative Systems Biology I2SysBio (CSIC-UV), Av. de Catalunya, 21, 46020 Valencia, Spain.

\* Correspondence: [mthernando@riojasalud.es](mailto:mthernando@riojasalud.es); Tel.: +34 941 27 88 76; Fax: +34 941 27 88 87 (M.dT.); [ysaenz@riojasalud.es](mailto:ysaenz@riojasalud.es); Tel.: +34 941 27 88 68; Fax: +34 941 27 88 87 (Y.S.).

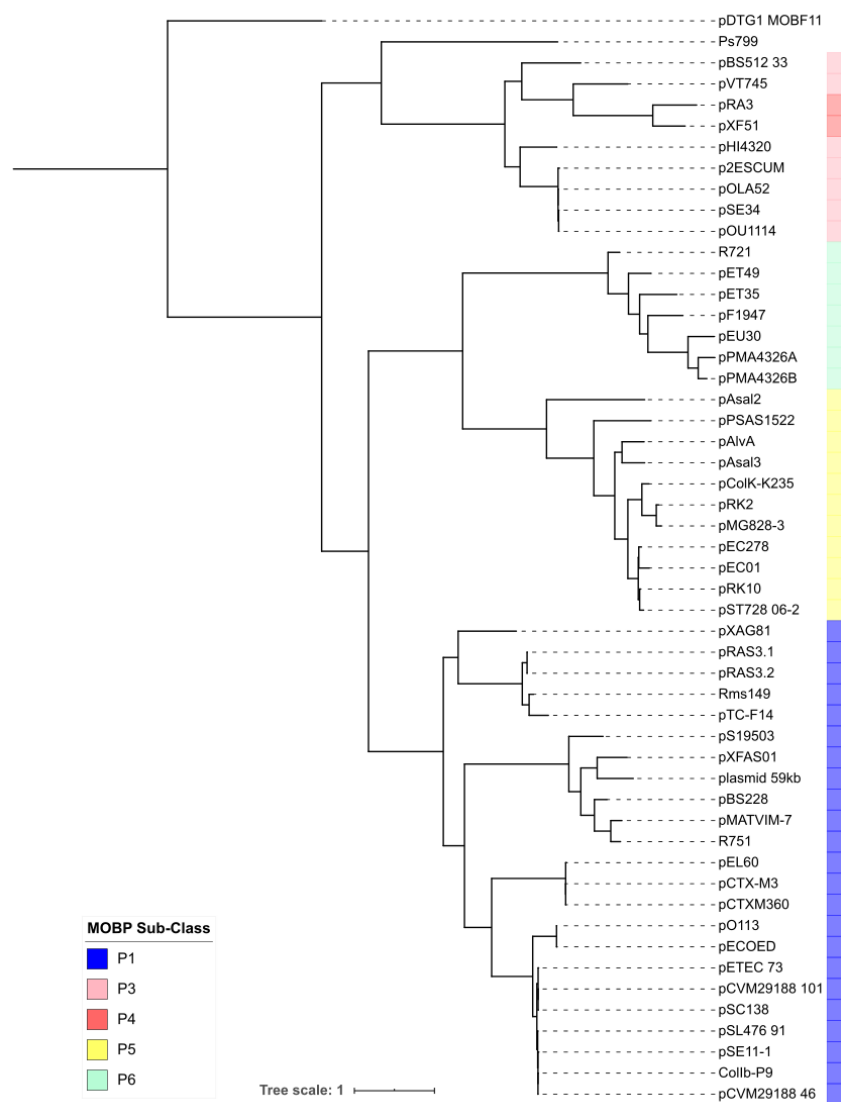

### Ps799\_MOB<sub>p</sub> relaxase amino acidic sequence

MSKGSRPDDELRFRRPQPGKPQQRGQPFVNQVLRQANKAGTGKPRKASHQPGASLGRGHVAARFSTKQLPSNARRVTIKTRLVNLRQAGK  
 RSTLSHLRYIERDGVSRGDPGQAYGPLTDQADLNAFEERGRDDRHOFRFIVSPEDAEQLEDLRTYTRHLMRMEADLGRRLDWMAYVDH  
 WNTDNPHTFIVLRGKDDTGKDLVIARDYIAEGMRNRASELATEWLGPRTLEIQQSLQREVQQERFTSLDRITLLREHQTVLSLKSAN  
 HPRRQLLIGRLQQLQKLELAYESRPGQWILRDD

**Figure S1.** Maximum likelihood phylogenetic tree of MOB<sub>p</sub> family relaxases, including the relaxase of the *P. mendocina* Ps799 genome, using IQ-TREE (version 1.6.10) [15]. The descriptions of the MOB<sub>p</sub> relaxases from different plasmids were included in Table S2. Colour code: black on yellow = invariant amino acids; black on green = key residues that define the relaxase. The MOB<sub>f11</sub> relaxase from pDTG1 plasmid (GenBank accession number NC\_004999) was used as an outgroup in order to root the tree.

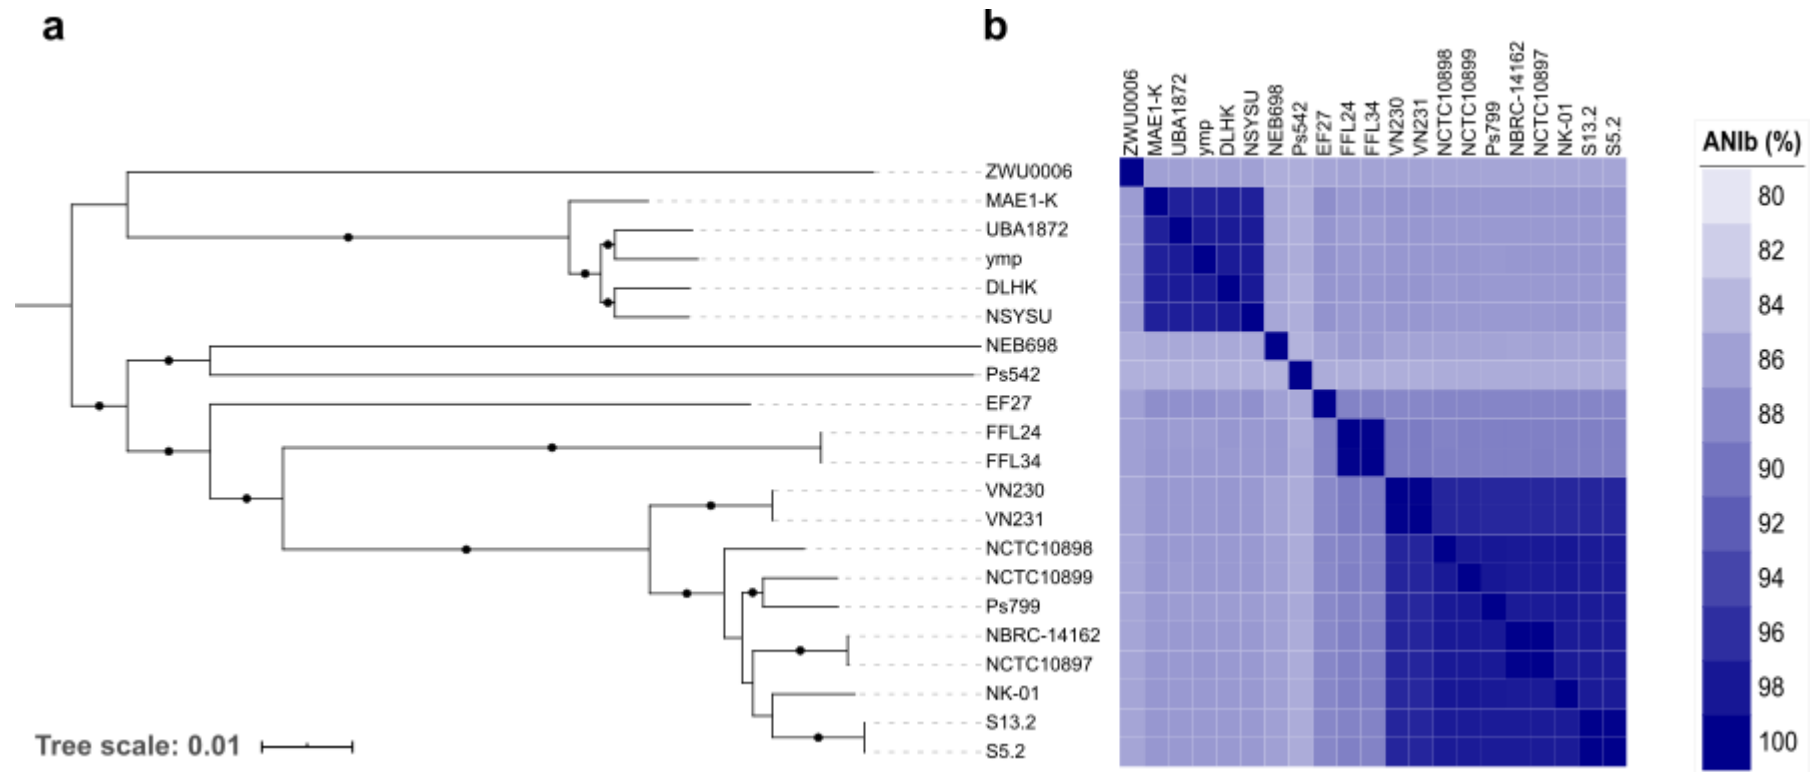

**Figure S2.** Phylogeny of the two *P. mendocina* genomes (Ps542 and Ps799) and the nineteen *P. mendocina* reference genomes described in the NCBI database (Table S1): **A.** Core-genome phylogenetic tree based on the essential core genome, using Roary (version 3.11.2) [14]. Bootstrap values from 90 to 100% were marked as black circles. **B.** Heatmap of the Average Nucleotide Identity based on BLAST (ANIb) for each pairwise comparison. Blue color key represents the percentage of differences between genomes.
